# Supplementary material for: Ausmaß, Entwicklung und Ursachen sozialer Ungleichheit beim Promotionszugang zwischen 1989–2009
Source: publisher site journal article supplement (doi:10.1515/zfsoz-2018-1003), 2018-02-23
Supplement: Supplementary file 1 [file Jaksztat_Loerz_2017_Online-Anhang_Version_02_03_2018.docx]

**Ausmaß, Entwicklung und Ursachen sozialer Ungleichheit beim Promotionszugang zwischen 1989-2009**

**Online-Anhang / Online Appendix**

**Steffen Jaksztat**

Deutsches Zentrum für Hochschul- und Wissenschaftsforschung GmbH, Lange Laube 12, 30159 Hannover; jaksztat@dzhw.eu

**Markus Lörz**

Leibniz Universität Hannover, Institut für Soziologie, Schneiderberg 50, 30167 Hannover; m.loerz@ish.uni-hannover.de

**Inhalt**

**Tabelle A1:** Bivariate Zusammenhänge zwischen den Mediatorvariablen und der Bildungsherkunft differenziert nach Kohorten

**Tabelle A2:** Übergänge in die Promotionsphase nach Fächergruppen (Anteile in Prozent)

**Tabelle A3:** Weitere Informationen zu Tabelle 3 (Standardfehler der logistischen Regression)

**Tabelle A4:** Ergebnisse der nicht-linearen Dekomposition: Herkunftsspezifische Unterschiede in der Promotionsaufnahme und Erklärungsbeiträge

**Tabelle A1:** Bivariate Zusammenhänge zwischen den Mediatorvariablen und der Bildungsherkunft differenziert nach Kohorten

| **Mediator** |  | **Bildungsherkunft** | **Kohorte** | | | | | |
| --- | --- | --- | --- | --- | --- | --- | --- | --- |
|  |  |  | **1989** | **1993** | **1997** | **2001** | **2005** | **2009** |
| **Examensnote** | (z-standardisiert je Kohorte und Fächergruppe) | 1) ohne HS-Abschluss | -0,05 | -0,03 | -0,07 | -0,05 | -0,16 | -0,14 |
|  | 2) ein Elternteil mit HS-Abschluss | 0,00 | -0,01 | 0,02 | -0,11 | 0,01 | 0,07 |
|  | 3) beide Eltern mit HS-Abschluss | 0,06 | 0,13 | 0,12 | 0,17 | 0,15 | 0,08 |
| **Note der HZB** | (z-standardisiert je Kohorte) | 1) ohne HS-Abschluss |  | -0,14 | -0,20 | -0,28 | -0,27 | -0,22 |
|  | 2) ein Elternteil mit HS-Abschluss | 1) | 0,04 | -0,07 | -0,12 | -0,04 | -0,12 |
|  | 3) beide Eltern mit HS-Abschluss |  | 0,29 | 0,33 | 0,24 | 0,25 | 0,22 |
| **Fächergruppe** | Sprach- und Kulturwiss. | 1) ohne HS-Abschluss | 18,0% | 20,1% | 22,1% | 30,2% | 32,9% | 32,8% |
|  |  | 2) ein Elternteil mit HS-Abschluss | 14,1% | 14,7% | 23,6% | 26,9% | 25,8% | 30,0% |
|  |  | 3) beide Eltern mit HS-Abschluss | 21,0% | 18,2% | 19,0% | 23,8% | 24,7% | 27,4% |
|  | Rechtswissenschaften | 1) ohne HS-Abschluss | 11,1% | 6,6% | 7,2% | 9,1% | 6,7% | 6,1% |
|  |  | 2) ein Elternteil mit HS-Abschluss | 12,8% | 9,5% | 8,2% | 10,0% | 7,2% | 7,1% |
|  |  | 3) beide Eltern mit HS-Abschluss | 11,1% | 11,0% | 13,5% | 11,9% | 10,2% | 7,0% |
|  | Wirtschaftswissenschaften | 1) ohne HS-Abschluss | 12,5% | 14,0% | 18,6% | 13,3% | 15,2% | 12,2% |
|  |  | 2) ein Elternteil mit HS-Abschluss | 8,1% | 12,1% | 12,9% | 14,3% | 13,8% | 12,3% |
|  |  | 3) beide Eltern mit HS-Abschluss | 5,4% | 9,8% | 10,7% | 8,7% | 10,5% | 13,0% |
|  | Sozialwissenschaften | 1) ohne HS-Abschluss | 4,0% | 3,4% | 3,7% | 3,7% | 5,8% | 6,2% |
|  |  | 2) ein Elternteil mit HS-Abschluss | 2,5% | 1,6% | 3,5% | 3,3% | 5,5% | 6,7% |
|  |  | 3) beide Eltern mit HS-Abschluss | 1,7% | 0,8% | 2,2% | 3,2% | 4,0% | 5,9% |
|  | Mathematik/Informatik | 1) ohne HS-Abschluss | 4,2% | 6,2% | 7,7% | 5,5% | 6,9% | 12,0% |
|  |  | 2) ein Elternteil mit HS-Abschluss | 3,7% | 5,3% | 6,0% | 6,0% | 6,4% | 8,0% |
|  |  | 3) beide Eltern mit HS-Abschluss | 3,4% | 5,3% | 5,7% | 5,4% | 8,6% | 9,1% |
|  | Naturwissenschaften | 1) ohne HS-Abschluss | 13,8% | 14,3% | 12,8% | 11,4% | 10,5% | 11,3% |
|  |  | 2) ein Elternteil mit HS-Abschluss | 12,5% | 14,1% | 13,7% | 9,1% | 12,4% | 12,3% |
|  |  | 3) beide Eltern mit HS-Abschluss | 13,6% | 15,2% | 14,0% | 11,9% | 9,7% | 9,7% |

| **Fortsetzung Tabelle A1** | | | | | | | | | | |
| --- | --- | --- | --- | --- | --- | --- | --- | --- | --- | --- |
| **Mediator** | | |  | **Bildungsherkunft** | **Kohorte** | | | | | |
|  | | |  |  | **1989** | **1993** | **1997** | **2001** | **2005** | **2009** |
|  | | | Medizin/Gesund'wiss. | 1) ohne HS-Abschluss | 13,0% | 9,5% | 6,6% | 5,9% | 6,0% | 5,4% |
|  | | |  | 2) ein Elternteil mit HS-Abschluss | 20,7% | 12,9% | 9,7% | 10,9% | 9,4% | 11,5% |
|  | | |  | 3) beide Eltern mit HS-Abschluss | 21,7% | 18,4% | 13,0% | 14,1% | 14,3% | 12,2% |
|  | | | Ingenieurwissenschaften | 1) ohne HS-Abschluss | 13,8% | 15,8% | 12,7% | 9,7% | 7,7% | 8,0% |
|  | | |  | 2) ein Elternteil mit HS-Abschluss | 14,7% | 19,4% | 14,2% | 11,5% | 9,6% | 7,8% |
|  | | |  | 3) beide Eltern mit HS-Abschluss | 11,0% | 13,3% | 13,3% | 10,5% | 9,2% | 10,2% |
|  | | | sonstige | 1) ohne HS-Abschluss | 9,6% | 10,2% | 8,5% | 11,1% | 8,4% | 6,1% |
|  | | |  | 2) ein Elternteil mit HS-Abschluss | 10,7% | 10,4% | 8,3% | 8,0% | 10,0% | 4,3% |
|  | | |  | 3) beide Eltern mit HS-Abschluss | 11,2% | 8,0% | 8,6% | 10,5% | 8,6% | 5,5% |
| **Tätigkeit als stud. Hilfskraft** (=ja) | | | | 1) ohne HS-Abschluss |  |  | 34,7% | 37,6% | 35,5% | 35,4% |
|  | |  | | 2) ein Elternteil mit HS-Abschluss | 1) | 1) | 36,6% | 36,5% | 43,2% | 38,1% |
|  | |  | | 3) beide Eltern mit HS-Abschluss |  |  | 36,1% | 46,8% | 49,7% | 44,2% |
| **Studienbezogene Auslandsmobilität** (=ja) | | | | 1) ohne HS-Abschluss |  | 4,1% | 4,7% | 9,4% | 15,1% | 32,1% |
|  | |  | | 2) ein Elternteil mit HS-Abschluss | 1) | 6,2% | 7,3% | 10,5% | 22,7% | 35,9% |
|  | |  | | 3) beide Eltern mit HS-Abschluss |  | 7,3% | 11,7% | 16,7% | 30,6% | 52,7% |
| **Geschlecht** (=männlich) | | | | 1) ohne HS-Abschluss | 60,6% | 57,8% | 53,7% | 51,2% | 43,5% | 42,2% |
|  |  | | | 2) ein Elternteil mit HS-Abschluss | 59,1% | 60,0% | 51,0% | 48,7% | 44,3% | 44,6% |
|  |  | | | 3) beide Eltern mit HS-Abschluss | 50,5% | 50,3% | 47,5% | 40,2% | 47,6% | 45,3% |
| **Alter** (in Jahren) | | | | 1) ohne HS-Abschluss | 27,7 | 27,9 | 28,1 | 28,1 | 27,9 | 27,4 |
|  |  | | | 2) ein Elternteil mit HS-Abschluss | 27,3 | 27,2 | 27,7 | 27,3 | 27,0 | 27,1 |
|  |  | | | 3) beide Eltern mit HS-Abschluss | 27,0 | 26,8 | 26,9 | 26,8 | 26,7 | 26,7 |
| Anmerkungen*:* 1) Information nicht vorhanden  Quelle: DZHW-Hochschulabsolventenbefragungen 1989-2009 (eigene Berechnungen, gewichtete Daten) | | | | | | | | | | |

**Tabelle A2:** Übergänge in die Promotionsphase nach Fächergruppen (Anteile in Prozent)

| **Fächergruppe** | **Kohorte** | | | | | |
| --- | --- | --- | --- | --- | --- | --- |
|  | **1989** | **1993** | **1997** | **2001** | **2005** | **2009** |
| - Wirtschaftswiss. | 17,5 | 18,2 | 14,4 | 14,9 | 14,3 | 15,2 |
| - Sprach- und Kulturwiss. | 23,4 | 29,5 | 21,7 | 17,2 | 17,4 | 17,0 |
| - Rechtswiss. | 25,0 | 31,4 | 32,8 | 32,6 | 37,5 | 39,6 |
| - Sozialwiss. | 27,9 | 27,0 | 22,7 | 30,4 | 23,6 | 23,7 |
| - Mathematik/Informatik | 24,6 | 26,9 | 16,5 | 15,8 | 28,1 | 23,2 |
| - Naturwiss. | 51,3 | 56,4 | 47,5 | 52,2 | 57,2 | 60,6 |
| - Humanmed./Gesundheitswiss. | 62,4 | 80,2 | 93,0 | 93,5 | 94,4 | 84,8 |
| - Ingenieurwiss. | 22,4 | 17,9 | 22,9 | 25,1 | 26,2 | 29,7 |
| - sonst. | 29,5 | 24,4 | 23,9 | 22,0 | 20,2 | 25,5 |

Quelle: DZHW-Hochschulabsolventenbefragungen 1989-2009 (eigene Berechnungen, gewichtete Daten)

**Tabelle A3:** Weitere Informationen zu Tabelle 3 (Standardfehler der logistischen Regression)

|  |  | **1989** | | | | **1993** | | | | **1997** | | | | **2001** | | | | **2005** | | | | **2009** | | | |
| --- | --- | --- | --- | --- | --- | --- | --- | --- | --- | --- | --- | --- | --- | --- | --- | --- | --- | --- | --- | --- | --- | --- | --- | --- | --- |
|  |  | M1 | | M2 | | M1 | | M2 | | M1 | | M2 | | M1 | | M2 | | M1 | | M2 | | M1 | | M2 | |
| **Bildungsherkunft** | |  |  |  |  |  |  |  |  |  |  |  |  |  |  |  |  |  |  |  |  |  |  |  |  |
|  | beide Eltern mit HS-eeineniAbschluss | | 2,499 | | --- | | 2,49859 |  | 1,65739 | | --- | | 2,49859 |   027 | | 2,195 | | 2,258 | | 2,005 | | 2,391 | | 1,630 | | 2,758 | | 2,004 | | 2,566 | | 1,596 | | 3,906 | | 2,635 | |
|  | ein Elternteil mit HS-Abschluss | 1,657  8 | | 1,399 | | 1,915 | | 1,585 | | 1,857 | | 1,274 | | 2,722 | | 1,833 | | 2,267 | | 1,622 | | 3,312 | | 2,460 | |
|  | (*Ref.: Eltern ohne HS-Abschluss*) |  |  |  |  |  |  |  |  |  |  |  |  |  |  |  |  |  |  |  |  |  |  |  |  |
| **Leistungsbezogene Faktoren** | |  |  |  |  |  |  |  |  |  |  |  |  |  |  |  |  |  |  |  |  |  |  |  |  |
|  | Schulabschlussnote (std.) |  |  | 1) | |  |  | 0,977 | |  |  | 0,808 | |  |  | 1,009 | |  |  | 0,833 | |  |  | 1,118 | |
|  | Examensnote (std.) |  |  | 1,319 | |  |  | 1,224 | |  |  | 0,890 | |  |  | 1,328 | |  |  | 0,946 | |  |  | 1,363 | |
| **Fächergruppe** | |  |  |  |  |  |  |  |  |  |  |  |  |  |  |  |  |  |  |  |  |  |  |  |  |
|  | Sprach- und Kulturwiss. |  |  | 3,062 | |  |  | 2,761 | |  |  | 2,639 | |  |  | 2,924 | |  |  | 2,737 | |  |  | 3,748 | |
|  | Rechtswiss. |  |  | 3,060 | |  |  | 3,487 | |  |  | 2,846 | |  |  | 4,021 | |  |  | 4,329 | |  |  | 4,956 | |
|  | Sozialwiss. |  |  | 4,234 | |  |  | 4,253 | |  |  | 3,476 | |  |  | 4,259 | |  |  | 4,131 | |  |  | 4,281 | |
|  | Mathematik/Informatik |  |  | 3,653 | |  |  | 3,152 | |  |  | 2,395 | |  |  | 3,020 | |  |  | 3,656 | |  |  | 4,166 | |
|  | Naturwiss. |  |  | 4,037 | |  |  | 3,006 | |  |  | 3,635 | |  |  | 4,513 | |  |  | 4,291  33 | |  |  | 4,090 | |
|  | Humanmed./Gesundheitswiss. |  |  | 3,327 | |  |  | 2,145 | |  |  | 2,461 | |  |  | 2,501 | |  |  | 2,956 | |  |  | 4,757 | |
|  | Ingenieurwiss. |  |  | 2,921 | |  |  | 2,794 | |  |  | 2,709 | |  |  | 3,267 | |  |  | 3,132 | |  |  | 5,571 | |
|  | Sonstiges |  |  | 8,981 | |  |  | 8,649 | |  |  | 5,913 | |  |  | 6,086 | |  |  | 5,326 | |  |  | 10,973 | |
|  | (*Ref.: Wirtschaftswiss*.) |  |  |  |  |  |  |  |  |  |  |  |  |  |  |  |  |  |  |  |  |  |  |  |  |
| **Tätigkeit als stud. Hilfskraft** | |  |  |  |  |  |  |  |  |  |  |  |  |  |  |  |  |  |  |  |  |  |  |  |  |
|  | Ja (*Ref.: nein*) |  |  | 1) | |  |  | 1) | |  |  | 1,358 | |  |  | 2,019  0,017 | |  |  | 1,479 | |  |  | 2,155 | |
| **Studienbezogene Mobilität** Ja *(Ref.:nein)* | |  |  |  |  |  |  | 2,897 | |  |  | 2,116 | |  |  | 2,491 | |  |  | 1,674 | |  |  | 2,043 | |
| **Kontrollvariablen** | |  |  |  |  |  |  |  |  |  |  |  |  |  |  |  |  |  |  |  |  |  |  |  |  |
|  | Geschlecht: Frau (*Ref. Mann*) |  |  | 1,461 | |  |  | 1,876 | |  |  | 1,566  0,013 | |  |  | 1,755 | |  |  | 1,526 | |  |  | 2,453 | |
|  | Alter (in Jahren) |  |  | 0,326 | |  |  | 0,399 | |  |  | 0,295 | |  |  | 0,359 | |  |  | 0,293 | |  |  | 0,375 | |
| Quelle: DZHW-Hochschulabsolventenbefragungen 1989-2009 (eigene Berechnungen, gewichtete Daten) Anmerkung: 1) Information nicht vorhanden; Die Standardfehler wurden mit 100 multipliziert. | | | | | | | | | | | | | | | | | | | | | | | | | |

**Tabelle A4:** Ergebnisse der nicht-linearen Dekomposition: Herkunftsspezifische Unterschiede in der Promotionsaufnahme und Erklärungsbeiträge

|  | **1989** | | **1993** | | **1997** | | **2001** | | **2005** | | **2009** | |
| --- | --- | --- | --- | --- | --- | --- | --- | --- | --- | --- | --- | --- |
| **Unterschiede in der Promotionsquote:** |  |  |  |  |  |  |  |  |  |  |  |  |
| P1 (beide Eltern mit HS-Abschluss) | 0,400 |  | 0,427 |  | 0,409 |  | 0,411 |  | 0,416 |  | 0,392 |  |
| P2 (Eltern ohne HS-Abschluss) | 0,305 |  | 0,309 |  | 0,274 |  | 0,250 |  | 0,255 |  | 0,251 |  |
|  |  |  |  |  |  |  |  |  |  |  |  |  |
| Herkunftsdifferenz (P1 – P2) | 0,095 |  | 0,118 |  | 0,135 |  | 0,161 |  | 0,161 |  | 0,141 |  |
| Erklärter Anteil der Differenz (absolut) | 0,044 |  | 0,089 |  | 0,109 |  | 0,083 |  | 0,146 |  | 0,095 |  |
| Erklärter Anteil der Differenz (relativ) | 0,463 |  | 0,754 |  | 0,807 |  | 0,516 |  | 0,907 |  | 0,673 |  |
| **Erklärungsbeiträge der einzelnen Variablen**: |  |  |  |  |  |  |  |  |  |  |  |  |
| Schulabschlussnote (std.) | 1) |  | -0,012 | * | -0,026 | *** | -0,015 | * | -0,016 | * | -0,021 | * |
| Examensnote (std.) | -0,011 | *** | -0,017 | *** | -0,018 | *** | -0,011 | *** | -0,038 | *** | -0,015 | *** |
| Fächergruppe: |  |  |  |  |  |  |  |  |  |  |  |  |
| - Sprach- und Kulturwiss. | -0,002 |  | 0,003 |  | 0,003 |  | 0,001 |  | 0,002 |  | 0,002 |  |
| - Rechtswiss. | 0,000 |  | -0,007 | * | -0,008 | * | -0,004 |  | -0,006 |  | -0,002 |  |
| - Sozialwiss. | 0,004 | * | 0,004 | ** | 0,003 | ** | 0,000 |  | 0,001 |  | 0,000 |  |
| - Mathematik/Informatik | 0,001 |  | 0,001 |  | -0,002 | * | 0,000 |  | -0,001 |  | -0,002 |  |
| - Naturwiss. | -0,001 |  | -0,014 | *** | -0,010 | *** | -0,009 | ** | -0,007 | *** | 0,001 |  |
| - Humanmed./Gesundheitswiss. | -0,039 | *** | -0,050 | *** | -0,039 | *** | -0,047 | *** | -0,049 | *** | -0,034 | *** |
| - Ingenieurwiss. | 0,002 |  | 0,001 |  | 0,000 |  | 0,000 |  | 0,000 |  | -0,001 |  |
| - Sonstiges | -0,002 |  | 0,004 |  | 0,000 |  | 0,001 |  | 0,000 |  | 0,001 |  |
| (*Ref.: Wirtschaftswiss*.) |  |  |  |  |  |  |  |  |  |  |  |  |
| Tätigkeit als stud. Hilfskraft | 1) |  | 1) |  | -0,002 | * | -0,010 | ** | -0,013 | *** | -0,018 | *** |
| Studentische Auslandsmobilität |  |  | -0,008 | *** | -0,006 |  | 0,003 |  | -0,006 |  | 0,002 |  |
| Alter (in Jahren) | -0,001 |  | -0,002 |  | -0,009 | * | -0,002 |  | -0,007 | * | -0,005 |  |
| Geschlecht: Mann (*Ref. Frau*) | 0,005 | *** | 0,007 | ** | 0,006 | ** | 0,012 | *** | -0,004 | * | -0,002 |  |

Quelle: DZHW-Hochschulabsolventenbefragungen 1989-2009 (eigene Berechnungen, gewichtete Daten)

Anmerkung: 1) Information nicht vorhanden; Nicht-lineare Dekomposition mit randomisierter Variablenabfolge und 1000 Wiederholungen; Signifikanzniveau: * p<0,05; ** p<0,01; *** p<0,001
